# Supplementary material
Source: PubMed Central journal article supplement (PMC9361610)
Supplement: 13063_2022_6445_MOESM3_ESM.pdf [file 13063_2022_6445_MOESM3_ESM.pdf]

## Summary of protocol changes following the start of enrollment [Version 05 (published protocol) to Version 07]

### Summary of Key Changes from Version 05 to Version 06:

| Affected Section(s)       | Summary of Revisions Made (05 to 06)                                                                                    | Rationale                         |
|---------------------------|-------------------------------------------------------------------------------------------------------------------------|-----------------------------------|
| Waiver of Consent section | To last paragraph in section: <ul style="list-style-type: none"> <li>Added option to post handout materials.</li> </ul> | Additional flexibility for sites. |

### Summary of Key Changes from Version 06 to Version 07:

| Affected Section(s)                            | Summary of Revisions Made (06 to 07)                                                                                                                                                                                                                                                                                                                                                                                                                                                                                                                                                            | Rationale                                                                 |
|------------------------------------------------|-------------------------------------------------------------------------------------------------------------------------------------------------------------------------------------------------------------------------------------------------------------------------------------------------------------------------------------------------------------------------------------------------------------------------------------------------------------------------------------------------------------------------------------------------------------------------------------------------|---------------------------------------------------------------------------|
| Training and Implementation subsection         | <ul style="list-style-type: none"> <li>Deleted “review of instructional manual”</li> <li>Deleted “co-assess cases with the “gold-star raters” and added reference to Training &amp; Implementation Manual, instead of MOP</li> <li>Replaced protocol study team with site research team</li> <li>Added the number of gold-star raters (3) that will be assessed each period to ensure fidelity.</li> <li>Added “training milestones” to the criteria to assess for before moving to the ESC intervention period.</li> <li>Renamed webinars to coaching calls and deleted “biweekly.”</li> </ul> | Protocol clarifications and internal consistency; study procedure changes |
| Page 24, line 523                              | <ul style="list-style-type: none"> <li>Changed section title to ESC Intervention Periods</li> </ul>                                                                                                                                                                                                                                                                                                                                                                                                                                                                                             | Consistency with other study periods                                      |
| Page 24 Intervention subsection; lines 577-587 | <ul style="list-style-type: none"> <li>Replaced protocol study team with site research team</li> <li>Deleted “study” and added “ESC intervention”</li> <li>Deleted “assessing 10 individuals”</li> <li>Added “NOWS infant, written cases”</li> <li>Deleted “through a centralized training platform” for utilizing just-in-time training</li> </ul>                                                                                                                                                                                                                                             | Protocol correction and clarification; add flexibility                    |
| Intervention subsection; lines 588-596         | <ul style="list-style-type: none"> <li>Deleted “the protocol study team will develop an electronic platform that will allow...”</li> <li>Deleted “The electronic platform will contain items from the ESC IRR tool (see MOP)”</li> <li>Added “keep completed ESC Implementation Process Evaluation Forms with other study documentation”</li> <li>Deleted sentence that stated sites will enter implementation process evaluation data into the electronic application and will send it directly to a central repository</li> </ul>                                                             | Clarify and correct process                                               |
